# Supplementary material for: High SURF4 expression is associated with poor prognosis of breast cancer
Source: publisher site journal article supplement (doi:10.18632/aging.204409), 2022-11-29
Supplement: Supplementary file [file aging-v14i22-204409-supplementary-material-SD1.pdf]

## SUPPLEMENTARY FIGURE

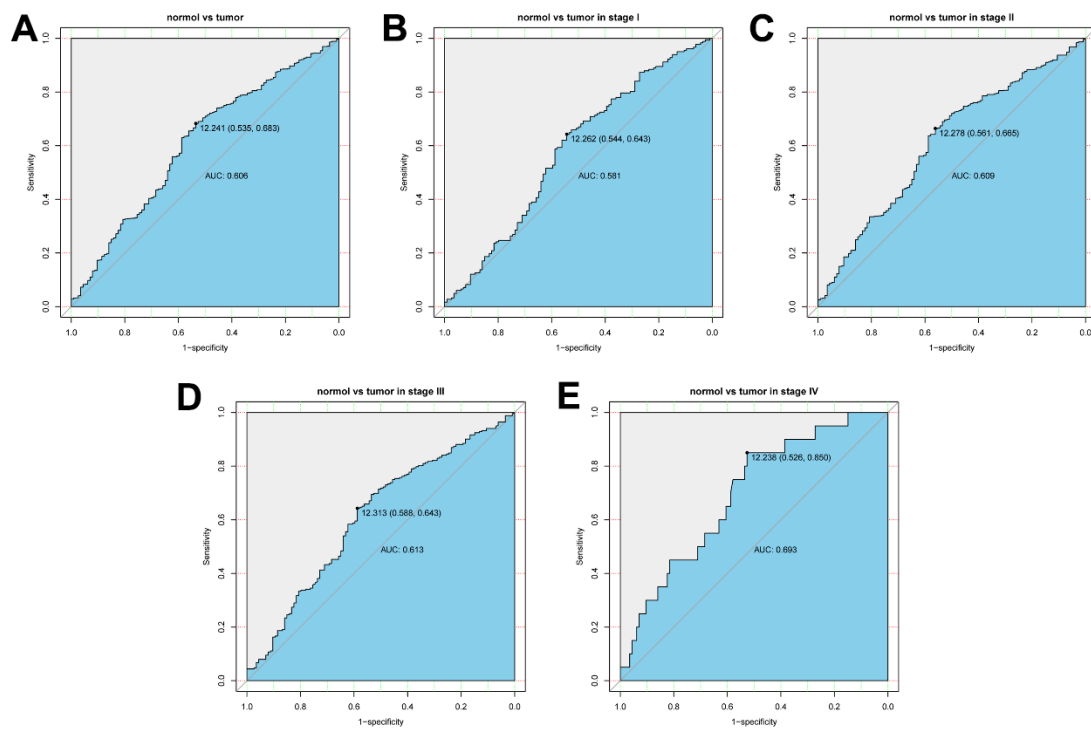

**Supplementary Figure 1. ROC curve to assess the diagnostic value of SURF4. (A)** ROC curve of SURF4 in normal vs. tumor. **(B–E)** ROC curve of SURF4 in stage I, stage II, stage III, and stage IV.
